# Supplementary material
Source: Springer Nature journal article supplement (https://www.springermedizin.de/resource/supplementary/13256_2011_2017_MOESM5_ESM.pdf/9649712)

APPAS

9  
10

TRANS KID

TRANS REN ART

PPSEUDOANEURYSM

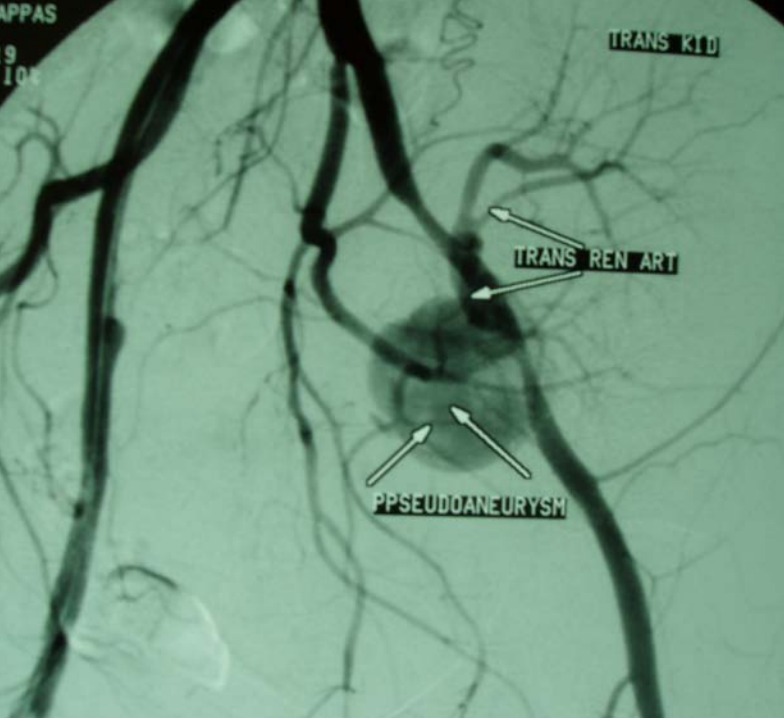

Supplement: MOESM5 [file 9649712]
